# Supplementary material for: MTCH2 cooperates with MFN2 and lysophosphatidic acid synthesis to sustain mitochondrial fusion
Source: PubMed Central journal article supplement (PMC10897490; doi:10.1038/s44319-023-00009-1), 2023-12-14
Supplement: 44319_2023_9_MOESM10_ESM.pdf [file 44319_2023_9_MOESM10_ESM.pdf]

## Expanded View Figures

### Figure EV1. 1 MTCH2 and MFN1 form a mitochondrial fusion pathway independent of MFN2.

(A) Representative images of MFN1 KO and MTCH2 KO MEFs either not expressing (control) or expressing MFN1-GFP. Mitochondria were stained with  $\alpha$ TOMM20 antibody. Scale bar 10  $\mu$ m. (B) Classical classification of mitochondrial network morphology of cells, showing average and SEM of three separate experiments (at least 20 cells were analyzed per condition). (C) Mitochondrial aspect ratio analysis. At least 20 control and 20 transfected cells were analyzed per condition. One-way ANOVA statistical analysis and SEM are shown. (D) Western blot analysis of mitochondrial fusion/fission machinery in heavy membrane (HM) fractions of WT and MTCH2 KO MEFs. (E) BN-GE of WT and MTCH2 KO HM fractions blotted with anti-MFN1 and MFN2 antibodies. SDHA serves as control. (F) qRT-PCR of MFN1 expression levels in WT MEFs treated with NT-siRNA or with MTCH1-siRNA. (G) Representative images of WT MEFs treated with NT-siRNA or with MTCH1-siRNA for 3 days. Mitochondria were stained with  $\alpha$ TOMM40 antibody. Scale bar 10  $\mu$ m. (H) Classical classification of mitochondrial network morphology of cells, showing average and SEM of three separate experiments (at least 20 cells were analyzed per condition). (I) Mitochondrial aspect ratio analysis. At least 20 cells were analyzed per condition. T-test statistical analysis and SEM are shown. (J) Representative images of MTCH2 KO MEFs expressing WT MTCH2-GFP, MTCH2-K25E GFP, or MTCH2-D189R GFP. Mitochondria were stained with  $\alpha$ TOMM40 antibody. Scale bar 10  $\mu$ m. (K) Classical classification of mitochondrial network morphology of cells, showing average and SEM of three separate experiments (at least 20 cells were analyzed per condition). (L) Mitochondrial aspect ratio analysis. At least 20 cells were analyzed per condition. One-way ANOVA statistical analysis and SEM are shown. Data information: (C,I,L) ns, not significant, \*\*\* $P < 0.001$ . Source data are available online for this figure.

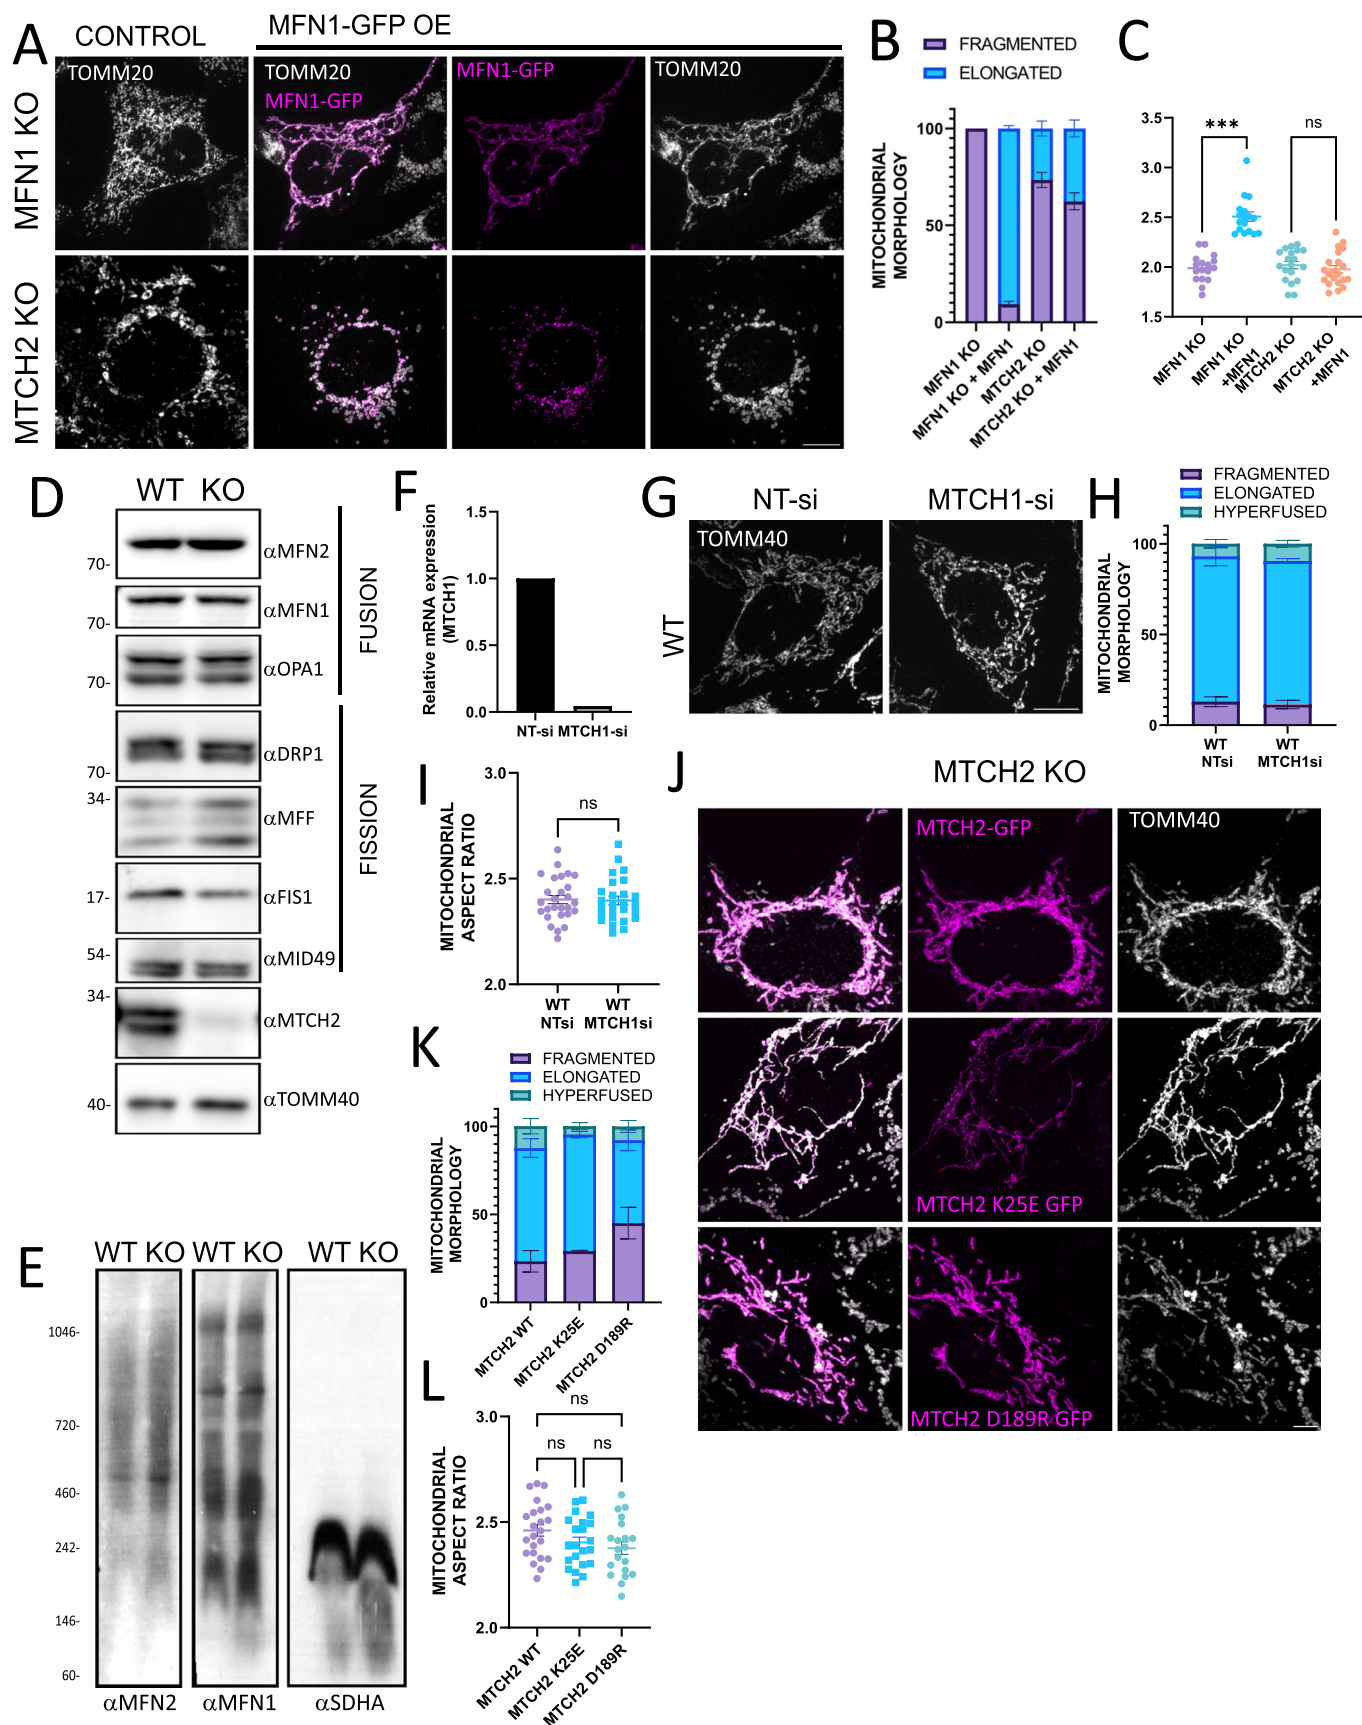

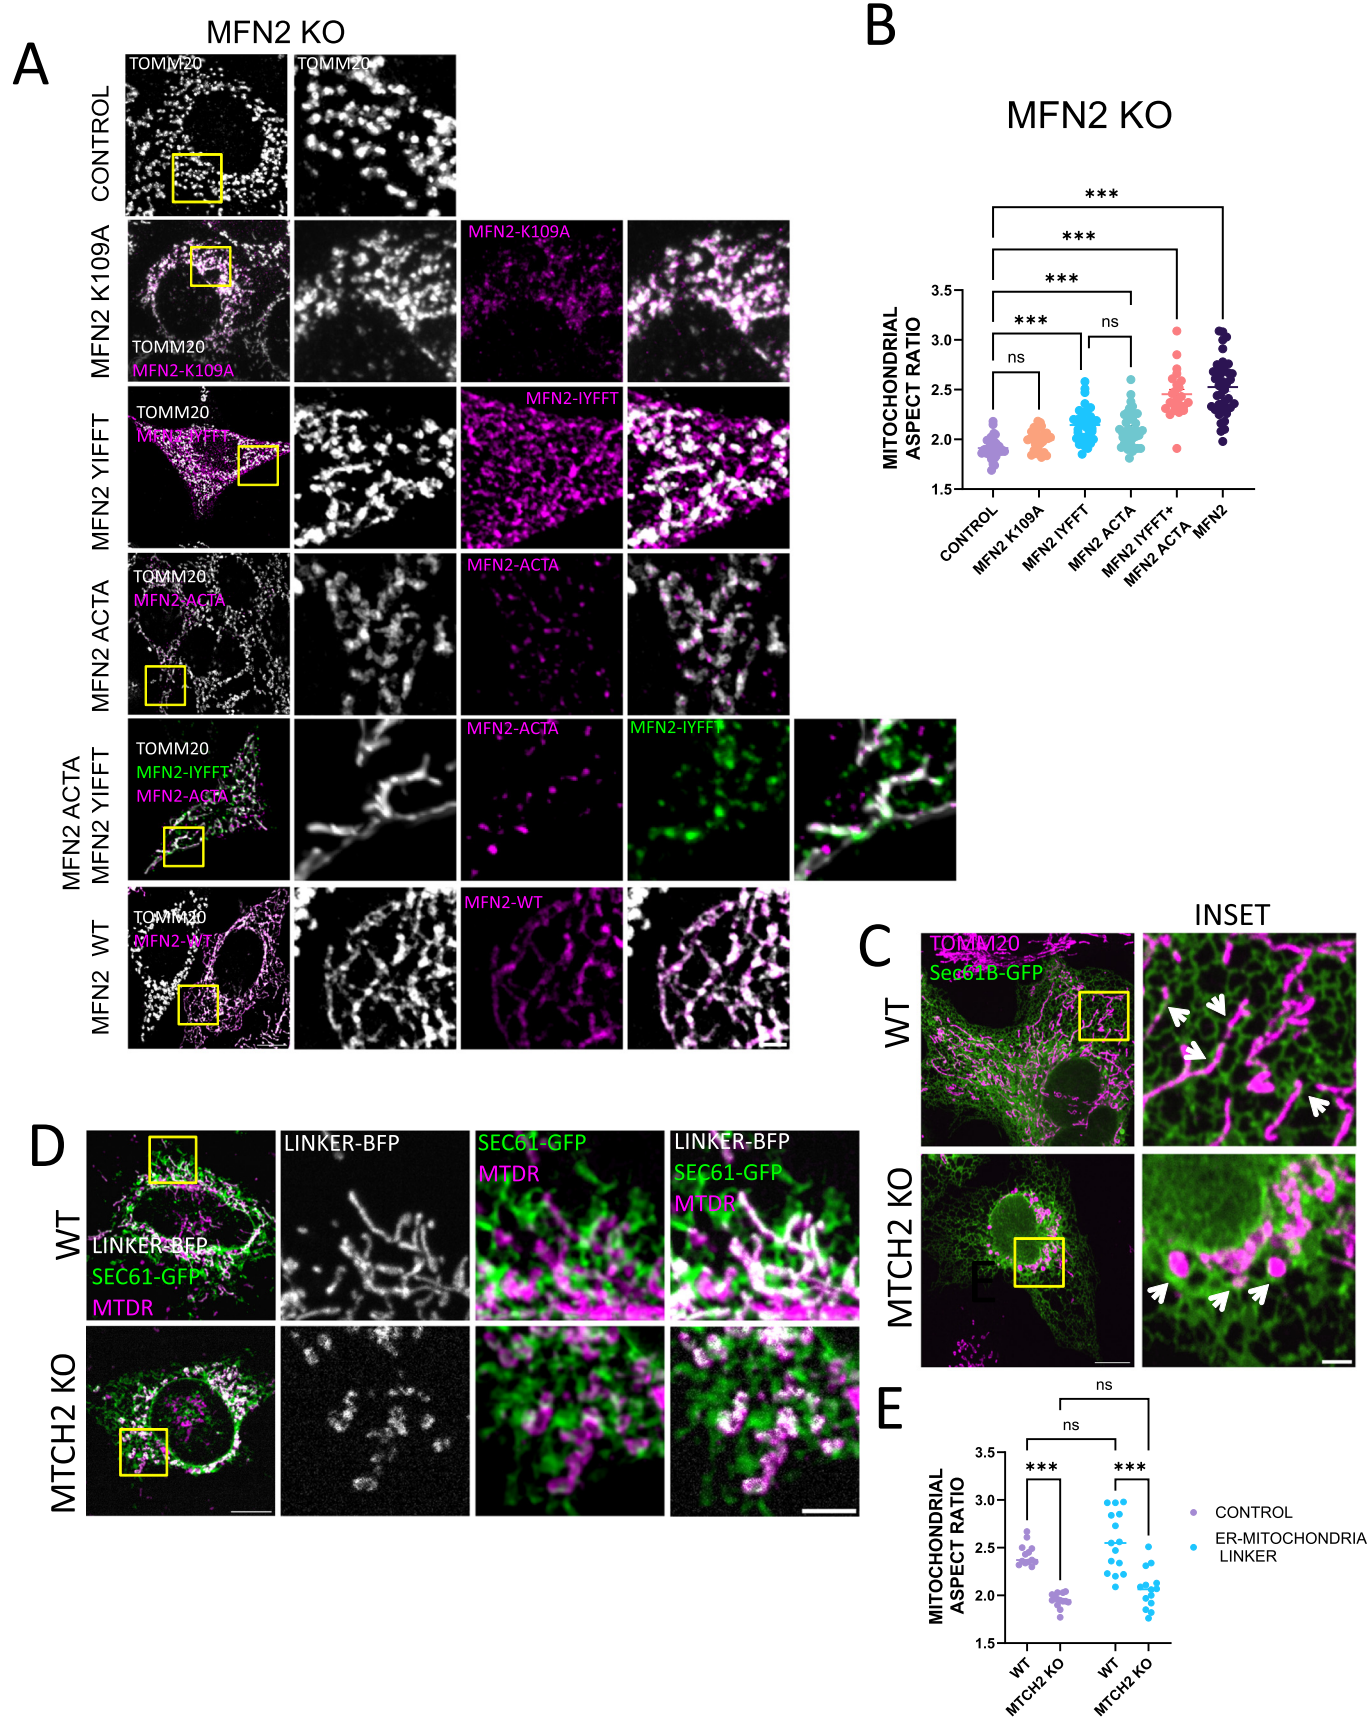

**◀ Figure EV2. MFN2's ability to enforce mitochondrial fusion in MTCH2 KO cells is partially disconnected from its fusion activity.**

(A) Representative images of MFN2 KO MEFs control or transfected with MFN2-K109A-FLAG, MFN2-IYFFT-MYC, MFN2-ACTA-V5, WT MFN2-MYC, or co-transfected with MFN2-IYFFT-MYC and MFN2-ACTA-V5. Mitochondria were stained with  $\alpha$ TOMM20 antibody. Scale bar 10  $\mu$ m; inset scale bar 5  $\mu$ m. (B) Mitochondrial aspect ratio analysis (at least 25 control and 25 transfected cells were analyzed per condition). One-way ANOVA statistical analysis and SEM are shown. (C) Representative images of WT and MTCH2 KO cells transfected with the ER marker Sec61b-GFP and stained with  $\alpha$ TOMM20 antibody. Arrowheads indicate areas of close proximity between ER and mitochondria. Scale bar 10  $\mu$ m; inset scale bar 2  $\mu$ m. (D) Representative images of WT and MTCH2 KO MEFs co-transfected with the ER-mitochondria linker construct AKAP-mtagBFP2-UBC6 and the ER marker Sec61b-GFP. Mitochondria were labeled with MTDR. Scale bar 10  $\mu$ m; Scale bar inset 5  $\mu$ m. (E) Mitochondrial aspect ratio analysis. At least 15 control and 15 transfected cells were analyzed per condition. One-way ANOVA statistical analysis and SEM are shown. Data information: (B,E) ns, not significant, \*\*\* $P < 0.001$ . Source data are available online for this figure.



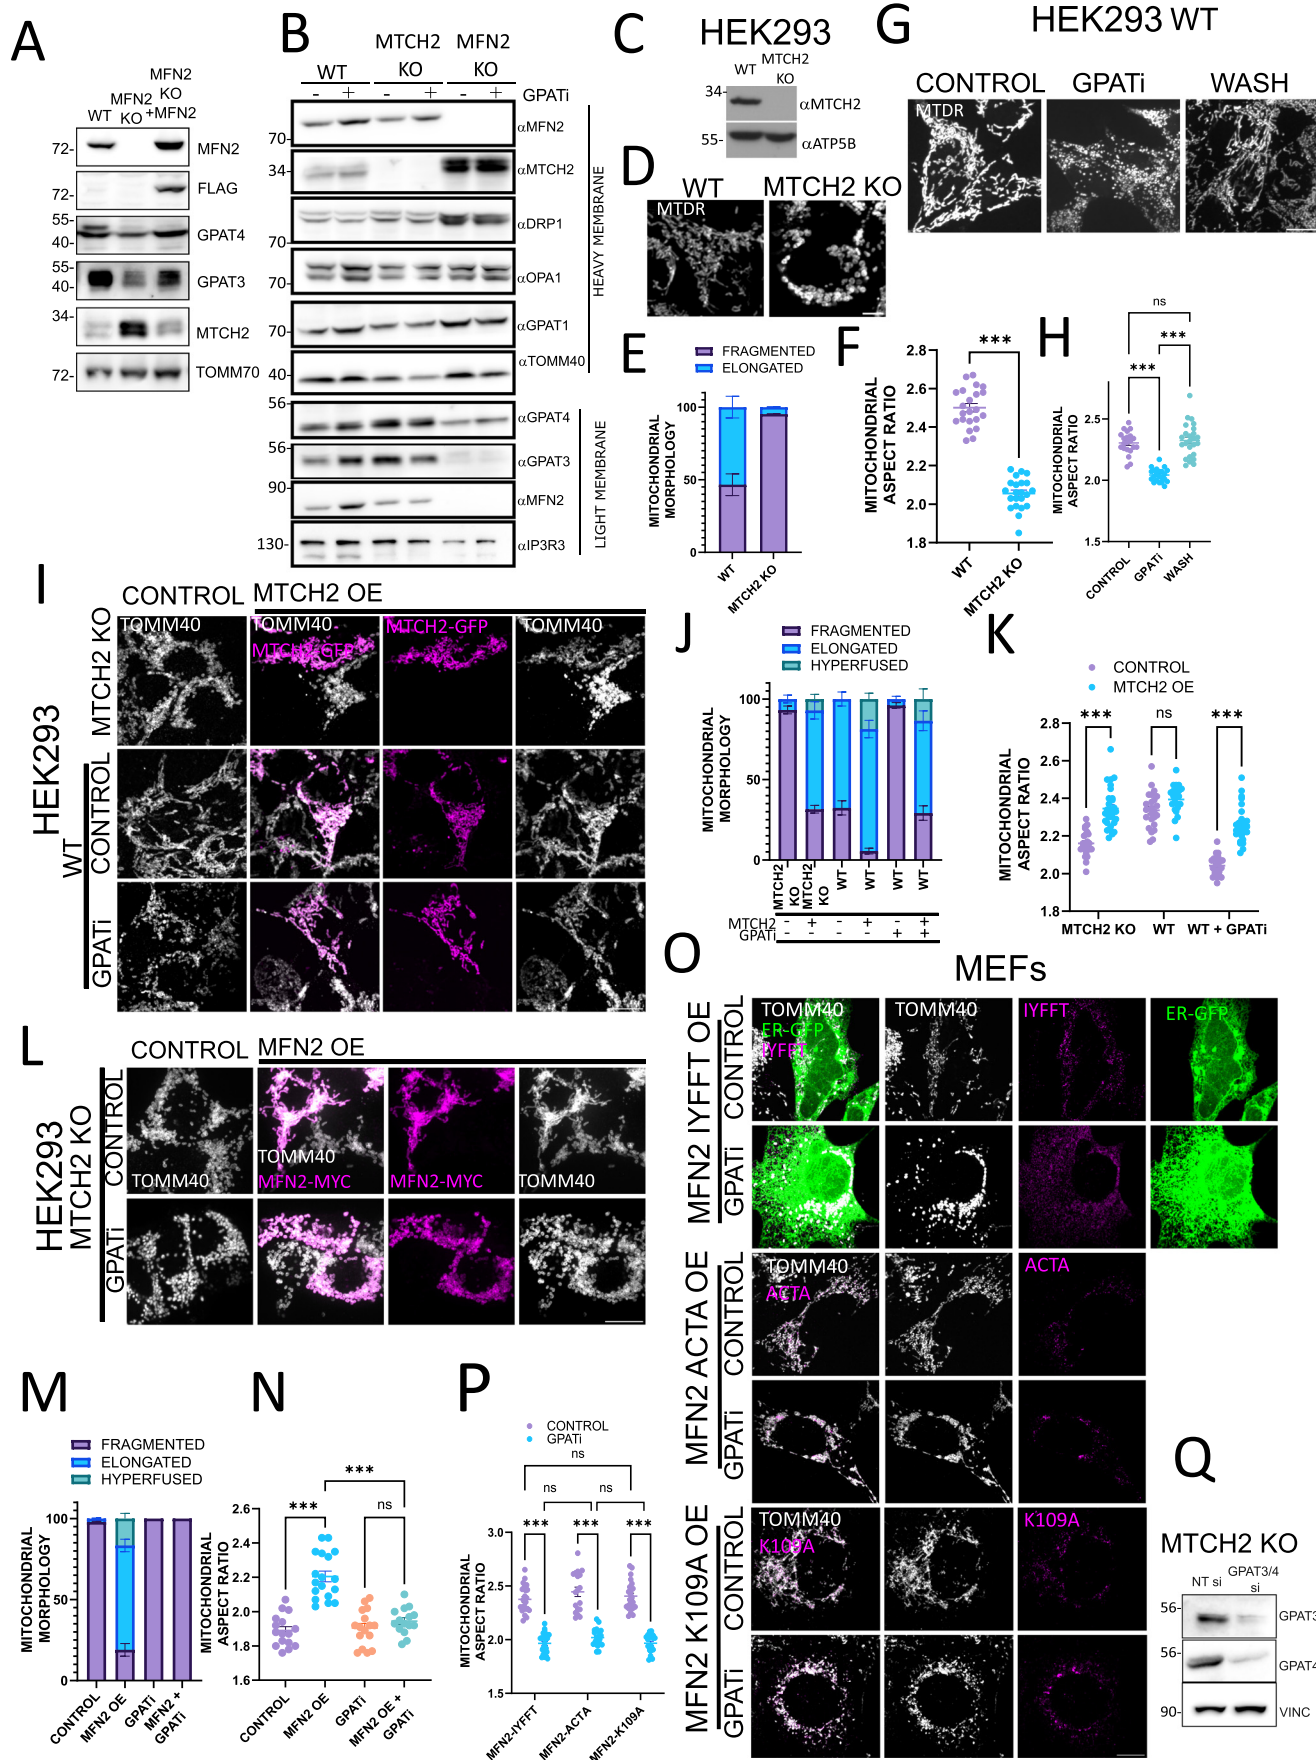

◀ **Figure EV3. MTCH2 deletion uncovers the requirement of LPA synthesis to sustain mitochondrial fusion enforced by MFN2 overexpression.**

(A) Western blot analysis in whole-cell lysates of GPAT3/4 and MTCH2 in WT, MFN2 KO, and MFN2 KO MEFs rescued with FLAG-MFN2; TOMM70 serves as loading control. (B) Western blot analysis of mitochondrial fusion/fission machinery and GPATs in HM and LM fractions of WT, MTCH2 KO, and MFN2 KO MEFs control or treated for 16 h with GPATi. TOMM40 serves as a HM loading control, and IP3R3 serve as a LM loading control. (C) Western blot analysis of MTCH2 expression in WT and MTCH2 KO HEK293T cells; ATPVb (complex V) serves as a loading control. (D) Representative images of mitochondria of WT and MTCH2 KO HEK293T cells. Mitochondria were labeled with MTD. Scale bar 5  $\mu$ m. (E) Classical classification of mitochondrial network morphology. Results are presented as average and SEM of three separate experiments; at least 20 fields were analyzed per condition. (F) Mitochondrial aspect ratio analysis. At least 25 fields were analyzed per condition. One-way ANOVA statistical analysis and SEM are shown. (G) Representative images of WT HEK293T cells either non-treated (control) or treated for 16 h with GPATi  $-/+$  wash and imaged after 4 h. Mitochondria were labeled with MTD. Scale bar 10  $\mu$ m. (H) Mitochondrial aspect ratio analysis. At least 25 fields were analyzed per condition. One-way ANOVA statistical analysis and SEM are shown. (I) Representative images of WT and MTCH2 KO HEK293T cells overexpressing MTCH2-GFP in control conditions, and of WT cells treated for 16 h with GPATi and overexpressing MTCH2-GFP. Mitochondria were stained using  $\alpha$ TOMM40 antibody. Scale bar 10  $\mu$ m. (J) Classical classification of mitochondrial network morphology. Results are presented as average and SEM of three separate experiments; at least 20 cells were analyzed per condition. (K) Mitochondrial aspect ratio analysis. At least 25 control and 25 transfected cells were analyzed per condition. One-way ANOVA statistical analysis and SEM are shown. (L) Representative images of MTCH2 KO HEK293T cells control or overexpressing MFN2-MYC non-treated or treated for 16 h with GPATi. Mitochondria were stained using  $\alpha$ TOMM40 antibody. Scale bar 10  $\mu$ m. (M) Classical classification of mitochondrial network morphology. Results are presented as average and SEM of three separate experiments; at least 20 cells were analyzed per condition. (N) Mitochondrial aspect ratio analysis of cells presented in L. At least 25 control and 25 transfected cells were analyzed per condition. One-way ANOVA statistical analysis and SEM are shown. (O) Representative images of MTCH2 KO MEFs transfected with MFN2-IYFFT-FLAG, MFN2-ACTA-FLAG, or MFN2-K109A-FLAG non-treated or treated for 16 h with GPATi. MFN2-IYFFT and MFN2-ACTA mutants were co-transfected with the ER marker Sec61-GFP to ensure the correct subcellular localization. Mitochondria were stained with  $\alpha$ TOMM40 antibody. Scale bar 10  $\mu$ m. (P) Mitochondrial aspect ratio analysis of cells presented in (O). At least 20 transfected cells were analyzed per condition. One-way ANOVA statistical analysis and SEM are shown. (Q) Western blot analysis in whole-cell lysates of GPAT3/4 expression in MTCH2 KO MEFs cells treated with NT-siRNA or with a combination of GPAT3 and 4 siRNAs; vinculin (VINC) serves as loading control. Data information: (F,H,K,N,P) ns, not significant,  $***P < 0.001$ . Source data are available online for this figure.

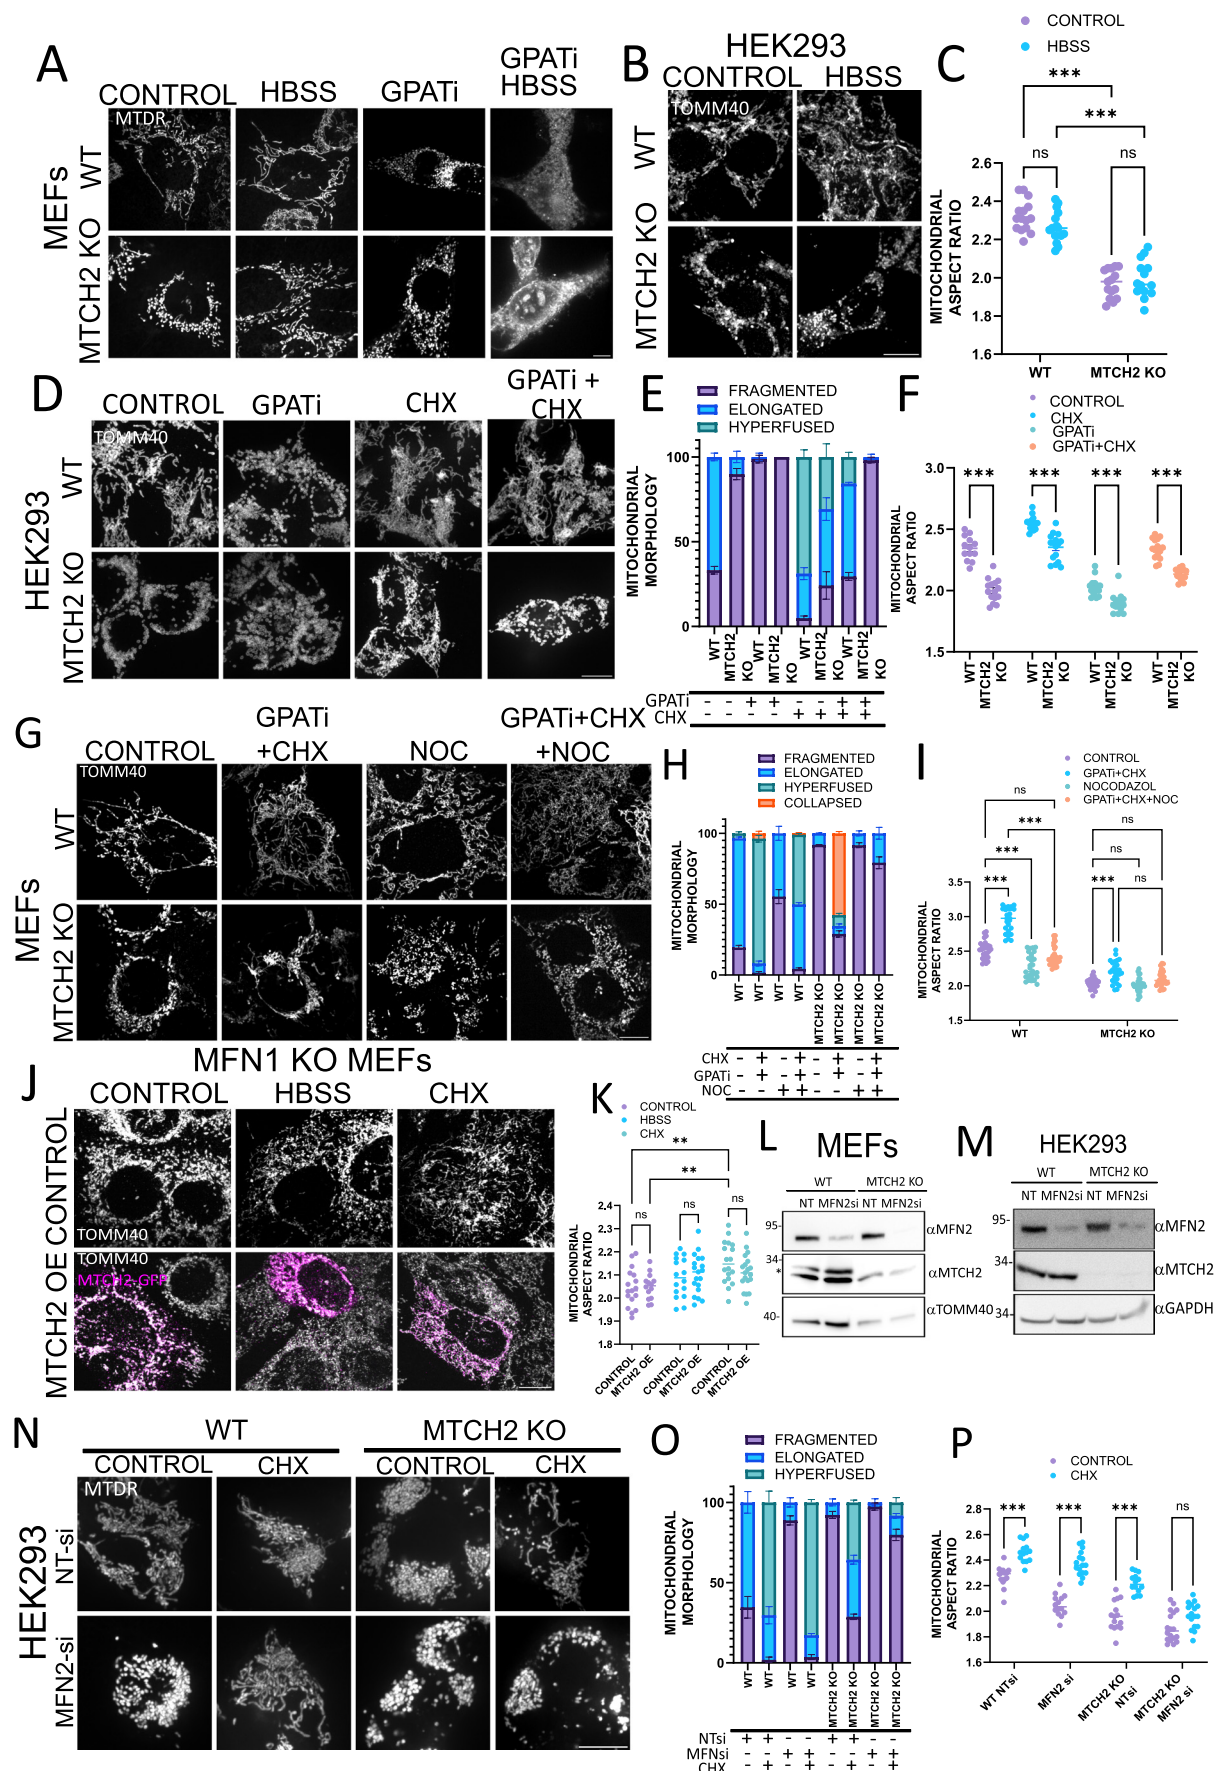

**Figure EV4. MTCH2 cooperates with MFN2 and LPA synthesis to sustain mitochondrial fusion under cellular stress conditions.**

(A) Representative images of WT and MTCH2 KO MEFs either non-treated (control), treated with HBSS for 4 h, treated with GPATi for 16 h, or pretreated for 16 h with GPATi and then treated with HBSS for 4 h in the presence of the inhibitor. Mitochondria were labeled with MTDR. Scale bar 10  $\mu$ m. (B) Representative images of WT and MTCH2 KO HEK293T cells non-treated (control) or treated with HBSS for 4 h. Mitochondria were stained with  $\alpha$ TOMM40 antibody. Scale bar 10  $\mu$ m. (C) Mitochondrial aspect ratio analysis. At least 20 fields were analyzed per condition. One-way ANOVA statistical analysis. (D) Representative images of WT and MTCH2 KO HEK293T cells either non-treated (control), treated with GPATi for 16 h, treated with 10  $\mu$ M CHX for 4 h or pretreated for 16 h with GPATi and then treated with 10  $\mu$ M CHX for 4 h in the presence of the inhibitor. Scale bar 10  $\mu$ m. (E) Classical classification of mitochondrial network morphology. Results are presented as average and SEM of three different experiments, and at least 30 cells analyzed per condition. (F) Mitochondrial aspect ratio analysis. At least 20 fields were analyzed per condition. One-way ANOVA statistical analysis and SEM are shown. (G) Representative images of WT and MTCH2 KO MEFs either non-treated (control), pretreated for 16 h with GPATi and then treated with 10  $\mu$ M CHX for 4 h in the presence of the inhibitor, treated with 5  $\mu$ M nocodazole (NOC) for 4 h or pretreated for 16 h with GPATi and then treated with 5  $\mu$ M NOC and 10  $\mu$ M CHX for 4 h in the presence of the inhibitor. Mitochondria were labeled with  $\alpha$ TOMM40 antibody. Scale bar 10  $\mu$ m. (H) Classical classification of mitochondrial network morphology. Results are presented as average and SEM of three different experiments, and at least 30 cells analyzed per condition. (I) Mitochondrial aspect ratio analysis. At least 25 fields were analyzed per condition. One-way ANOVA statistical analysis and SEM are shown. (J) Representative images of MFN1 KO MEFs control or overexpressing MTCH2-GFP in control conditions or treated for 4 h with HBSS or CHX. Mitochondria were stained with  $\alpha$ TOMM40 antibody. Scale bar 10  $\mu$ m. (K) Mitochondrial aspect ratio analysis. At least 20 cells were analyzed per condition. One-way ANOVA statistical analysis and SEM are shown. (L) Western blot analysis of MFN2 in WT and MTCH2 KO MEFs treated with NT-siRNA or with siRNA targeting MFN2 expression, and TOMM40 serves as loading control. \*Depicts a non-specific band. (M) Western blot analysis of MFN2 in WT and MTCH2 KO HEK293T cells treated with non-targeting (NT) siRNA or with MFN2 siRNA. GAPDH serves as a loading control. (N) Representative images of WT and MTCH2 KO HEK293T cells treated with non-targeting (NT) siRNA or with MFN2 siRNA non-treated or treated with CHX for 4 h. Mitochondria were labeled with MTDR. Scale bar 10  $\mu$ m. (O) Classical classification of mitochondrial network morphology. Results are presented as average and SEM of three different experiments, and at least 30 cells analyzed per condition. (P) Mitochondrial aspect ratio. At least 20 fields were analyzed per condition. One-way ANOVA statistical analysis and SEM are shown. Data information: (C,F,I,K,P) ns, not significant, \*\* $P < 0.01$ , \*\*\* $P < 0.001$ . Source data are available online for this figure.
